# Supplementary material
Source: Elsevier journal article supplement (https://www.sciencedirect.com/science/article/pii/S1134207222000056)
Supplement: mmc1 [file S1134207222000056:mmc1.pdf]

# Anexo III. Versión castellana del cuestionario de matutinidad-vespertinidad de Horne y Östberg (revisado)<sup>1</sup>

Nombre: \_\_\_\_\_ Fecha: \_\_\_\_\_

Por favor, para cada pregunta selecciona la respuesta que mejor se ajuste a tu caso marcándola con una cruz en el cuadrado correspondiente. Responde en función de cómo te has sentido en las últimas semanas.

1. Si solo pensaras en cuándo te sentirías mejor y fueras totalmente libre de planificarte el día, ¿a qué hora te levantarías?

- 5  Entre las 05:00 (5 a.m.) y 06:30 (6:30 a.m.) de la mañana
- 4  Entre las 06:30 (6:30 a.m.) y las 07:45 (7:45 a.m.) de la mañana
- 3  Entre las 07:45 (7:45 a.m.) y las 09:45 (9:45 a.m.) de la mañana
- 2  Entre las 09:45 (9:45 a.m.) y las 11:00 (11 a.m.) de la mañana
- 1  Entre las 11 (11 a.m.) de la mañana y las 12 del mediodía (12 noon)

2. Si solo pensaras en cuándo te sentirías mejor y fueras totalmente libre de planificarte el día, ¿a qué hora te acostarías?

- 5  A las 20:00 (8 p.m.) – 21:00 (9 p.m.)
- 4  A las 21:00 (9 p.m.) – 22:15 (10:15 p.m.)
- 3  A las 22:15 (10:15 p.m.) – 00:30 (12:30 a.m.)
- 2  A las 00:30 (12:30 a.m.) – 01:45 (1:45 a.m.)
- 1  A las 01:45 (1:45 a.m.) – 03:00 (3 a.m.)

3. Para levantarte por la mañana a una hora específica, ¿hasta qué punto necesitas que te avise el despertador?

- 4  No lo necesito
- 3  Lo necesito poco
- 2  Lo necesito bastante
- 1  Lo necesito mucho

<sup>1</sup>Algunas preguntas y algunas de las opciones de las posibles respuestas se han reescrito a partir del test original (Horne y Östberg, 1976) para adaptarlo al español. Las opciones que suponían categorías discretas se han sustituido por escalas gráficas continuas. Preparado por Terman M, Rifkin JB, Jacobs J, White TM. New York State Psychiatric Institute, New York, NY, EE. UU. Ver también la versión automatizada (AutoMEQ) en [www.cet.org](http://www.cet.org). La traducción del inglés fue realizada por las Dras. M.ª Ángeles Rol de Lama, Beatriz Baño Otálorra, María Teresa Mondéjar Abenza y el Dr. Juan Antonio Sarabia Carazo. Para las preguntas en España, póngase en contacto por favor con Juan Antonio Madrid, doctor en Fisiología, especialista en Cronobiología, Universidad de Murcia, Campus de Espinardo, Murcia, España, [jamadrid@um.es](mailto:jamadrid@um.es).

Horne JA, Östberg O. A self-assessment questionnaire to determine morningness-eveningness in human circadian rhythms. *Int J Chronobiol*, 1976;4:97-100.

4. ¿Te resulta fácil levantarte por las mañanas? (cuando no te despiertan de forma inesperada):
- 1  Nada fácil
  - 2  No muy fácil
  - 3  Bastante fácil
  - 4  Muy fácil
5. Una vez levantado por las mañanas, ¿qué tal te encuentras durante la primera media hora?
- 1  Nada alerta
  - 2  Poco alerta
  - 3  Bastante alerta
  - 4  Muy alerta
6. Una vez levantado por las mañanas, ¿cómo es tu apetito durante la primera media hora?
- 1  Muy escaso
  - 2  Bastante escaso
  - 3  Bastante bueno
  - 4  Muy bueno
7. Una vez levantado por las mañanas, ¿qué tal te sientes durante la primera media hora?
- 1  Muy cansado
  - 2  Bastante cansado
  - 3  Bastante descansado
  - 4  Muy descansado
8. Cuando no tienes compromisos al día siguiente, ¿a qué hora te acuestas en relación con tu hora habitual?
- 4  Nunca o raramente o más tarde
  - 3  Menos de 1 hora más tarde
  - 2  De 1 a 2 horas más tarde
  - 1  Más de 2 horas más tarde
9. Has decidido hacer un poco de ejercicio físico. Un amigo te propone hacerlo una hora dos veces por semana y según él, la mejor hora sería de 7 a 8 de la mañana. No teniendo nada más en cuenta salvo tu propio reloj "interno", ¿cómo crees que te encontrarías?
- 4  Estaría en buena forma
  - 3  Estaría en una forma aceptable
  - 2  Me resultaría difícil
  - 1  Me resultaría muy difícil
10. ¿A qué hora aproximada de la noche te sientes cansado y como consecuencia necesitas dormir?
- 5  A las 20:00 (8 p.m.) – 21:00 (9 p.m.)
  - 4  A las 21:00 (9 p.m.) – 22:15 (10:15 p.m.)
  - 3  A las 22:15 (10:15 p.m.) – 00:45 (12:45 a.m.)
  - 2  A las 00:45 (12:45 a.m.) – 02:00 (2 a.m.)
  - 1  A las 02:00 (2 a.m.) – 03:00 (3 a.m.)

11. Quieres estar en tu punto máximo de rendimiento para una prueba de 2 horas que va a ser mentalmente agotadora. Siendo totalmente libre de planificar el día y pensando solo en cuándo te sentirías mejor, ¿qué horario elegirías?
- 6  De 08:00 (8 a.m.) a 10:00 (10 a.m.)
  - 4  De 11:00 (11 a.m.) a 13:00 (1 p.m.)
  - 2  De 13:00 (1 p.m.) a 17:00 (5 p.m.)
  - 0  De 19:00 (7 p.m.) a 21:00 (9 p.m.)
12. Si te acostaras a las 11 de la noche, ¿qué nivel de cansancio notarías?
- 0  Ningún cansancio
  - 2  Algún cansancio
  - 3  Bastante cansancio
  - 5  Mucho cansancio
13. Por algún motivo te has acostado varias horas más tarde de lo habitual, aunque al día siguiente no has de levantarte a ninguna hora en particular. ¿Cuándo crees que te despertarías?
- 4  A la hora habitual y ya no dormiría más
  - 3  A la hora habitual y luego dormiría
  - 2  A la hora habitual y volvería a dormirme
  - 1  Más tarde de lo habitual
14. Una noche tienes que permanecer despierto de 4 a 6 de la madrugada debido a una guardia nocturna. Sin tener ningún compromiso al día siguiente, ¿qué preferirías?
- 1  No acostarme hasta pasada la guardia
  - 2  Echar una siesta antes y dormir después
  - 3  Echar un buen sueño antes y una siesta después
  - 4  Solo dormirías antes de la guardia
15. Tienes que hacer 2 horas de trabajo físico pesado. Eres totalmente libre para planificarte el día. Pensando solo en cuándo te sentirías mejor, ¿qué horario escogerías?
- 4  De 08:00 (8 a.m.) a 10:00 (10 a.m.)
  - 3  De 11:00 (11 a.m.) a 13:00 (1 p.m.)
  - 2  De 13:00 (1 p.m.) a 17:00 (5 p.m.)
  - 1  De 19:00 (7 p.m.) a 21:00 (9 p.m.)
16. Has decidido hacer ejercicio físico intenso. Un amigo te sugiere practicar una hora dos veces por semana de 10 a 11 de la noche. Pensando solo en cuándo te sentirías mejor, ¿cómo crees que te sentaría?
- 1  Estaría en buena forma
  - 2  Estaría en una forma aceptable
  - 3  Me resultaría difícil
  - 4  Me resultaría muy difícil
17. Imagínate que puedes escoger tu horario de trabajo. Supón que tu jornada es de CINCO horas al día (incluyendo los descansos) y que tu actividad es interesante y remunerada según tu rendimiento. ¿Qué CINCO HORAS CONSECUTIVAS seleccionarías? ¿Empezando en qué hora? Considera la casilla marcada más a la derecha para escoger entre los siguientes rangos:

- 5  Entre las 04:00 (4 a.m.) y las 08:00 (8 a.m.)
- 4  Entre las 08:00 (8 a.m.) y las 09:00 (9 a.m.)
- 3  Entre las 09:00 (9 a.m.) y las 14:00 (2 p.m.)
- 2  Entre las 14:00 (2 p.m.) y las 17:00 (5 p.m.)
- 1  Entre las 17:00 (5 p.m.) y las 04:00 (4 a.m.)

18. ¿A qué hora del día crees que alcanzas tu máximo bienestar?

- 5  Entre las 05:00 (5 a.m.) y las 08:00 (8 a.m.)
- 4  Entre las 08:00 (8 a.m.) y las 10:00 (10 a.m.)
- 3  Entre las 10:00 (10 a.m.) y las 17:00 (5 p.m.)
- 2  Entre las 17:00 (5 p.m.) y las 22:00 (10 p.m.)
- 1  Entre las 22:00 (10 p.m.) y las 05:00 (5 a.m.)

19. Se habla de personas de tipo matutino y vespertino. ¿Cuál de estos tipos te consideras ser?

- 6  Un tipo claramente matutino
- 4  Un tipo más matutino que vespertino
- 2  Un tipo más vespertino que matutino
- 1  Un tipo claramente vespertino

Suma los puntos que figuran al lado de la casilla.

La puntuación obtenida ha sido: \_\_\_\_\_ puntos.

### INTERPRETA Y UTILIZA TU PUNTUACIÓN DE MATUTINIDAD-VEPERTINIDAD

Este cuestionario tiene 19 preguntas, cada una con un número de puntos. Primero, suma los puntos e introduce tu puntuación de matutinidad-vespertinidad aquí:

Las puntuaciones pueden ir de 16 a 86 puntos. Puntuaciones de 41 o menos indican “tipo vespertino”. Puntuaciones de 59 o más indican “tipo matutino”. Puntuaciones entre 42-58 indican “tipo intermedio”.

| 16-30              | 31-41               | 42-58      | 59-69             | 70-86            |
|--------------------|---------------------|------------|-------------------|------------------|
| Vespertino extremo | Vespertino moderado | Intermedio | Matutino moderado | Matutino extremo |

Ocasionalmente, algunas personas pueden tener problemas con el cuestionario. Por ejemplo, algunas de las preguntas son difíciles de contestar si has sido un trabajador a turnos, si no trabajas o si te vas a la cama inusualmente tarde. Tus respuestas pueden estar influidas por estar pasando una enfermedad o estar tomando medicamentos. *Si no estás seguro de tus respuestas, tampoco deberías seguir ciegamente los siguientes consejos.*

Una forma de estar más seguros es comprobar si tu puntuación de matutinidad-vespertinidad coincide aproximadamente con las horas de inicio y final del sueño que aparecen a continuación:

| Puntuación       | 16-30                                  | 31-41                                      | 42-58                                       | 59-69                                 | 70-86                                |
|------------------|----------------------------------------|--------------------------------------------|---------------------------------------------|---------------------------------------|--------------------------------------|
| Inicio del sueño | 02:00-03:00<br><i>2:00-3:00 a.m.</i>   | 00:45-02:00<br><i>12:45 p.m.-2:00 a.m.</i> | 22:45-00:45<br><i>10:45 p.m.-12:45 a.m.</i> | 21:30-22:45<br><i>9:30-10:45 p.m.</i> | 21:00-21:30<br><i>9:00-9:30 p.m.</i> |
| Final del sueño  | 10:00-11:30<br><i>10:00-11:30 a.m.</i> | 08:30-10:00<br><i>8:30-10:00 a.m.</i>      | 06:30-08:30<br><i>6:30-8:30 a.m.</i>        | 05:00-06:30<br><i>5:00-6:30 a.m.</i>  | 04:00-05:00<br><i>4:00-5:00 a.m.</i> |

Si sueles irte a dormir antes de las 21:00 (9:00 p.m.) o más tarde de las 03:00 (3:00 a.m.), o si tu hora de despertar es anterior a las 04:00 (4:00 a.m.) o más tarde de las 11:30 (11:30 a.m.), deberías consultar a un experto clínico en luminoterapia para someterte a un tratamiento efectivo.

Nosotros usamos la puntuación de matutinidad-vespertinidad para mejorar el efecto antidepressivo de la luminoterapia. Aunque la mayoría de las personas experimentan una buena respuesta antidepressiva a la luminoterapia cuando reciben una sesión matinal de 10000 lux durante 30 minutos con un dispositivo de luz adecuado (ver recomendaciones en [www.cet.org](http://www.cet.org)), podríamos no obtener la mejor respuesta posible. Si tu reloj interno está desplazado con respecto a la hora ambiental (cuya medida indirecta es la puntuación de matutinidad-vespertinidad), necesitaremos ajustar la hora de aplicación de la luminoterapia.

La tabla que se incluye más abajo muestra la hora recomendada para comenzar la luminoterapia para un amplio rango de matutinidad-vespertinidad. Si tu puntuación se sale de este rango (ya sea por muy alto o muy bajo), deberías buscar consejo en una clínica de luminoterapia para buscar un tratamiento efectivo.

| Puntuación de matutinidad-vespertinidad | Hora de inicio de los 30 minutos de luminoterapia |
|-----------------------------------------|---------------------------------------------------|
| 23-26                                   | 8:15 a.m.                                         |
| 27-30                                   | 8:00 a.m.                                         |
| 31-34                                   | 7:45 a.m.                                         |
| 35-38                                   | 7:30 a.m.                                         |
| 39-41                                   | 7:15 a.m.                                         |
| 42-45                                   | 7:00 a.m.                                         |
| 46-49                                   | 6:45 a.m.                                         |
| 50-53                                   | 6:30 a.m.                                         |
| 54-57                                   | 6:15 a.m.                                         |
| 58-61                                   | 6:00 a.m.                                         |
| 62-65                                   | 5:45 a.m.                                         |
| 66-68                                   | 5:30 a.m.                                         |
| 69-72                                   | 5:15 a.m.                                         |
| 73-76                                   | 5:00 a.m.                                         |

Si normalmente duermes más de 7 horas por noche, necesitarás despertarte algo antes de lo normal para conseguir el efecto –pero deberías sentirte por ello mejor. Algunas personas compensan acostándose antes, mientras que otras se sienten bien durmiendo menos. Si, normalmente, duermes menos de 7 horas por noche deberías poder mantener tu hora actual de despertar. Si automáticamente puedes despertarte por ti mismo más de 30 minutos antes del inicio de tu sesión, deberías retrasar tu sesión. Evita tomar sesiones antes de la hora recomendada, pero si te quedas dormido a pesar de que suene la alarma del reloj, es mejor tomar la sesión tarde que saltártela.

Nuestra recomendación para las personas vespertinas –es decir, las 08:00 (8:00 a.m.) para una puntuación de matutinidad-vespertinidad de 30– puede dificultar que lleguemos a tiempo al trabajo, pero recibir la se-

sión de la luz antes no sería eficaz. Una vez que notes mejoría con la hora recomendada, puedes ir adelantando poco a poco la sesión de luminoterapia, en unos 15 minutos al día, permitiendo que tu reloj interno se sincronice con el ciclo sueño-vigilia y horario de trabajo que deseas.

El consejo personalizado que te ofrecemos aquí está basado en un amplio ensayo clínico con pacientes que sufren trastorno afectivo estacional (SAD, *seasonal affective disorder*) realizado en el Centro Médico de la Universidad de Columbia de New York. Los pacientes que recibieron la sesión de luz demasiado tarde por la mañana solo mejoraron la mitad que aquellos que la recibieron aproximadamente a la hora indicada. Estas normas no se aplican solo al SAD, sino que también pueden ser de ayuda en el tratamiento de la depresión no estacional, reduciendo el insomnio y las ganas de quedarse durmiendo por las mañanas.

Nuestros consejos solo constituyen una guía general para los nuevos usuarios de la luminoterapia. Hay muchos factores individuales que pueden requerir diferentes programas o dosis (intensidad, duración) de luz. Ninguna persona con depresión clínica debería someterse a luminoterapia a menos que sea de forma controlada y bajo supervisión médica.

## Bibliografía

Terman M, Terman JS. Light therapy for seasonal and nonseasonal depression: efficacy, protocol, safety, and side effects. *CNS Spectrums*. 2005;10:647-63 (descargable en [www.cet.org](http://www.cet.org)).

Copyright © 2008, Center for Environmental Therapeutics, [www.cet.org](http://www.cet.org), New York, NY USA. Todos los derechos reservados. Está permitida la reproducción con fines no comerciales. Para las preguntas en España, póngase en contacto por favor con Juan Antonio Madrid, doctor en Fisiología, especialista en Cronobiología, Universidad de Murcia, Campus de Espinardo, Murcia, España, [jamadrid@um.es](mailto:jamadrid@um.es).
